# Supplementary material
Source: Elsevier journal article supplement (https://www.sciencedirect.com/science/article/pii/S2605153219302079)
Supplement: mmc1 [file S2605153219302079:mmc1.docx]

**SUPPLEMENTARY DATA**

REFERENCES

Cooke JC, Dupuche DR, Gay TJ. Quadricuspid aortic valve. *Echocardiography.* 2000;17:699.

Yildirim SV, Gümüş A, Coşkun I, Türköz R. Quadricuspid aortic valve: a rare cause of aortic regurgitation and stenosis. *Turk J Pediatr.* 2008;50:500-502.

Di Pino A, Gitto P, Silvia A, Bianca I. Congenital quadricuspid aortic valve in children. *Cardiol Young.* 2008;18:324-327.

Ozlü MF, Ozcan F, Cagli K, Golbasi Z. Quadricuspid aortic valve in a patient with mitral valve prolapse. *Can J Cardiol.* 2008;24:e27.

Jagannath AD, Johri AM, Liberthson R, et al. Quadricuspid aortic valve: a report of 12 cases and a review of the literature. *Echocardiography.* 2011;28:1035-1040.

George BA, O'Hayre TA, Schussler JM. Association between congenitally quadricuspid aortic valveand mitral valve prolapse. *Proc (Bayl Univ Med Cent).* 2013;26:272-274.
